# Supplementary material for: IR position-sensitive detectors based on double-junction asymmetric TiO2/MoS2/reduced graphene-oxide sandwiches
Source: Royal Society of Chemistry journal article supplement (doi:10.1039/c8tc02361a), 2018-01-01
Supplement: c8tc02361a1.pdf [file c8tc02361a1.pdf]

## Supporting Information

# **IR Position-Sensitive Detectors Based on the Double-Junction Asymmetric TiO<sub>2</sub>/MoS<sub>2</sub>/Reduced Graphene-Oxide Sandwiches**

Mohammad Javadi <sup>a,b</sup>, Mahdiyeh Gholami <sup>a</sup>, and Yaser Abdi <sup>a,\*</sup>

<sup>a</sup> Nanophysics Research laboratory, Department of Physics, University of Tehran, Tehran, 14395-547, Iran

<sup>b</sup> The author's present address: Dipartimento di Fisica, Sapienza Università di Roma, I-00185 Rome, Italy

\* Corresponding author: y.abdi@ut.ac.ir

**Keywords:** MoS<sub>2</sub>/reduced graphene oxide; Lateral photovoltage effect; optical position sensors; 2D infrared photodetectors

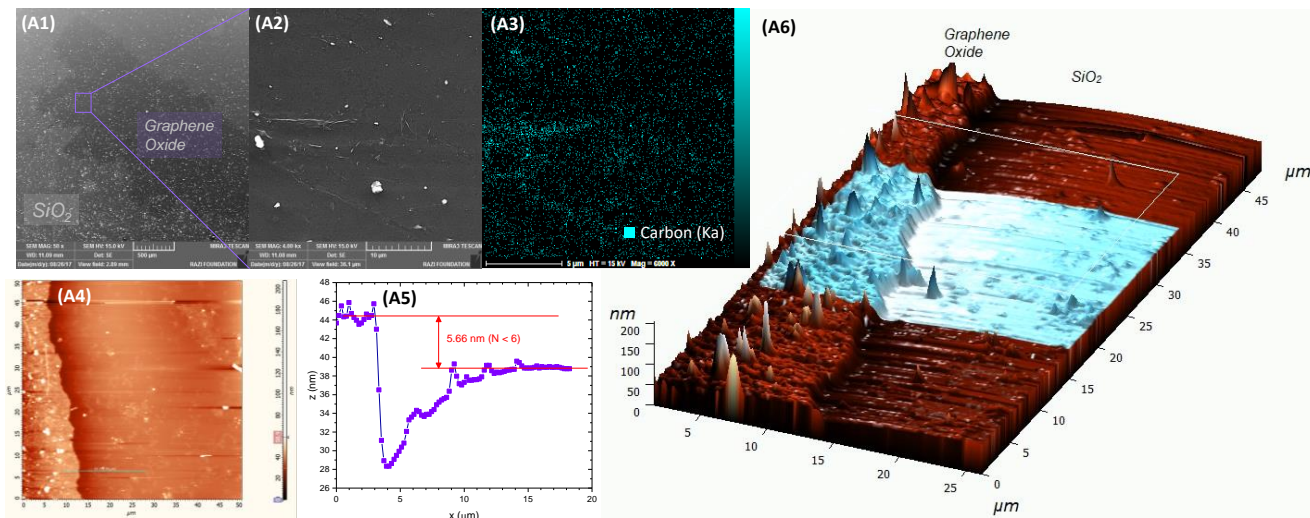

**Figure S1.** (A1-A2) SEM images of a large-area graphene oxide sheet used as substrate for the MoS<sub>2</sub> growth. (A3) EDS elemental surface map showing the distribution of carbon atoms in A2. (A4) AFM topographic image obtained from the edge of graphene oxide sheet. (A5) The thickness profile of the indicated line in A4. The average thickness of graphene oxide sheet obtained from different parts of the edge is estimated to be ~ 6 nm suggesting the average number of graphene layers to be  $N < 10$ . (A6) 3D topographic image from the edge of graphene oxide sheet in A4 illustrating the puckered surface of RGO. The ice colored region is devoted for better identification of crossing between SiO<sub>2</sub> and graphene oxide sheet.

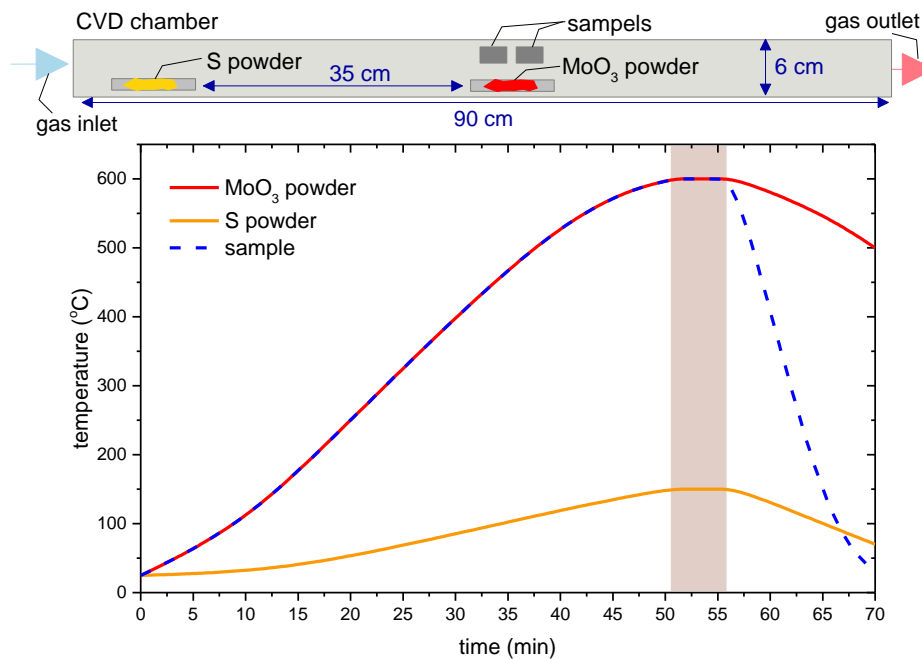

**Figure S2.** Upper panel: The schematic of CVD configuration used for the growth of MoS<sub>2</sub> flakes. Down panel: The temperature–time diagram of the MoO<sub>3</sub> powder, S powder, and test samples during the growth MoS<sub>2</sub> nanoflakes.

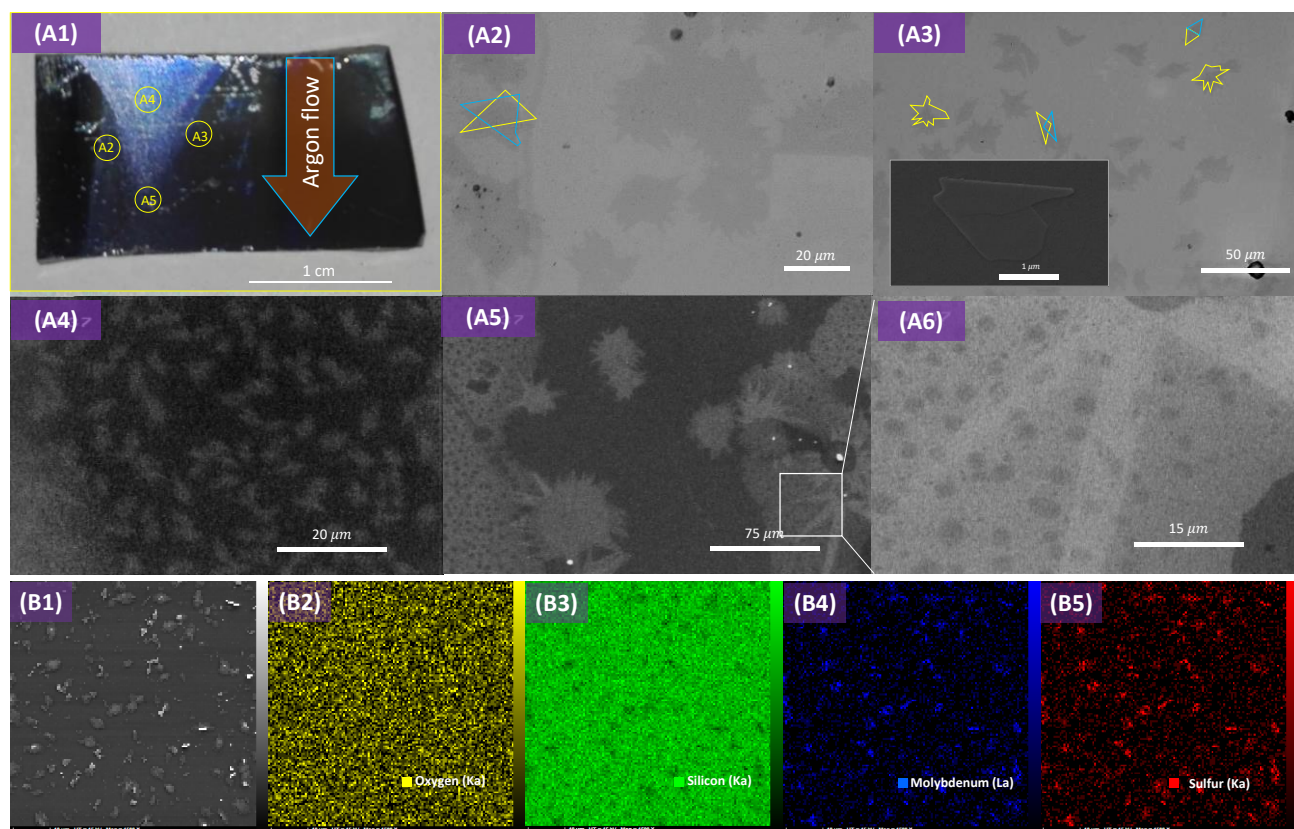

**Figure S3.** (A1) Optical image of a SiO<sub>2</sub> sample covered by MoS<sub>2</sub> mono/few-layers. Direction of the gas flow is depicted in the photo. (A2-A5) SEM images obtained from different parts of the sample. The corresponding location of each image is indicated in A1. The well-known MoS<sub>2</sub> triangle crystals with mono/bi-layer structure are appeared in the side regions (A2 and A3). The central region of the sample is covered via multilayer MoS<sub>2</sub> flakes as shown in A4 and A5. (A6) shows a magnified image from the indicated part in A5. (B1-B5) EDS elemental surface map obtained from the central region of the sample showing the distribution of oxygen, silicon, molybdenum, and sulfur. It is noted that the oxygen atoms are distributed uniformly over the surface of SiO<sub>2</sub> and no concentration of the oxygen is observed in those regions covered by flakes which implies the absence of MoO<sub>x</sub> on the SiO<sub>2</sub> surface.

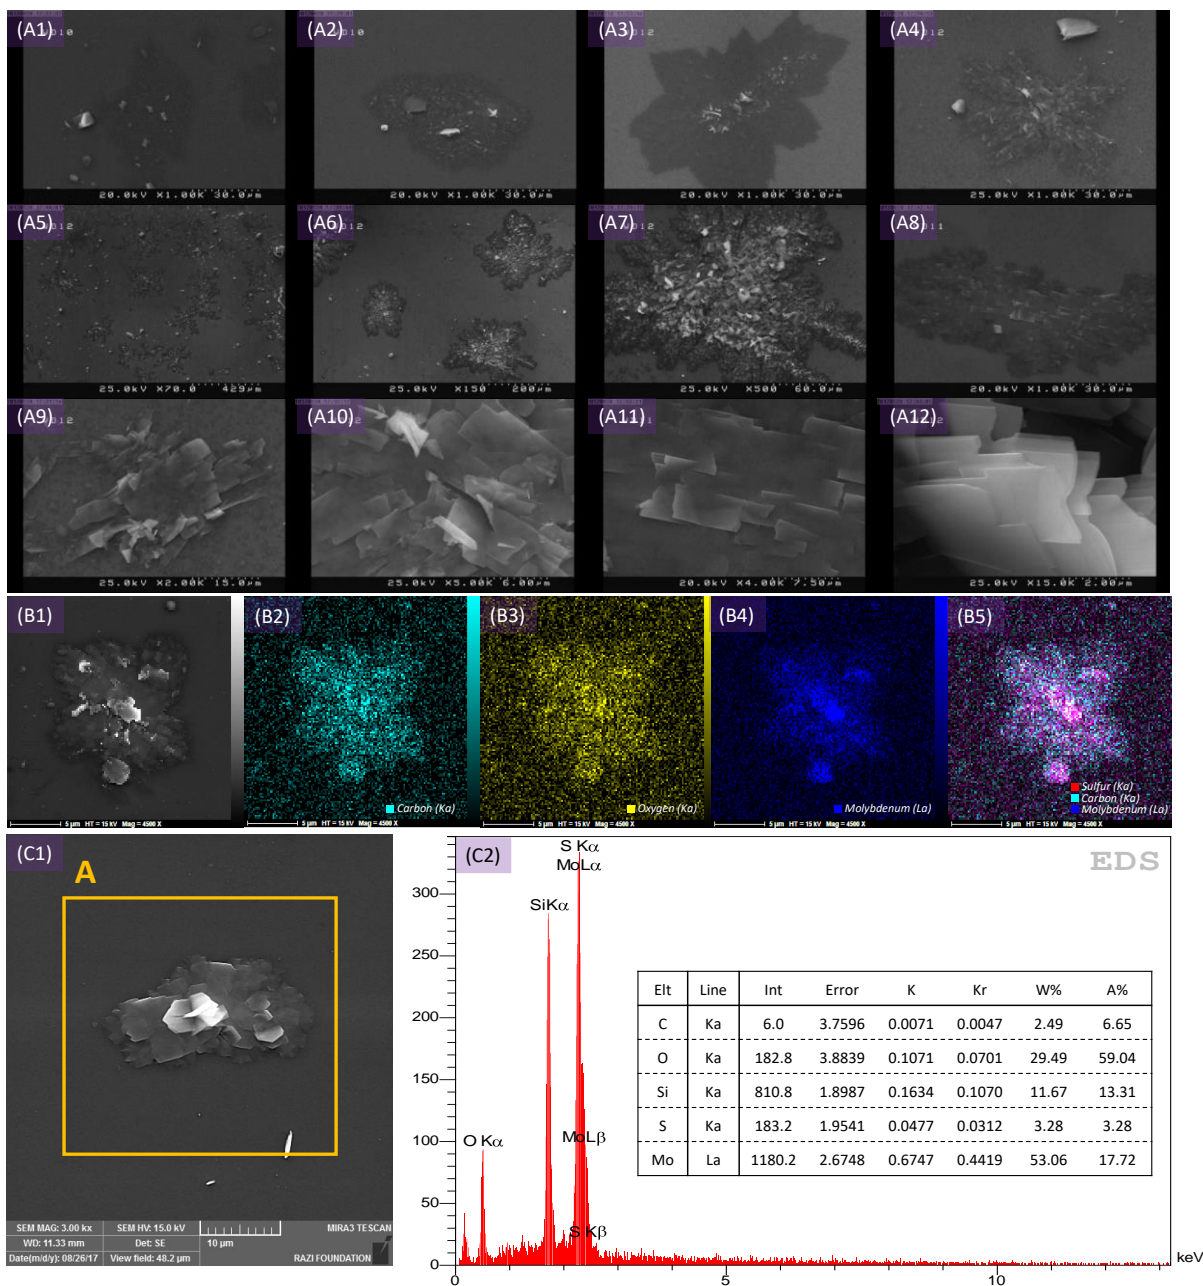

**Figure S4.** (A1-A4) The evolution of fractal structures during the growth process. (A5-A8) SEM images from the fractal-like aggregations of MoS<sub>2</sub> flakes in different samples. (A9-A12) Magnified SEM images taken from the top of different fractals indicating the multilayered structure of stacked MoS<sub>2</sub> flakes. (B1-B5) EDS elemental distribution surface maps taken from a fractal-like aggregation of MoS<sub>2</sub> nanoflakes. (C1-C2) EDS analysis of the relative weight and area coverage (in percent) of different elements measured through the frame A in C1.

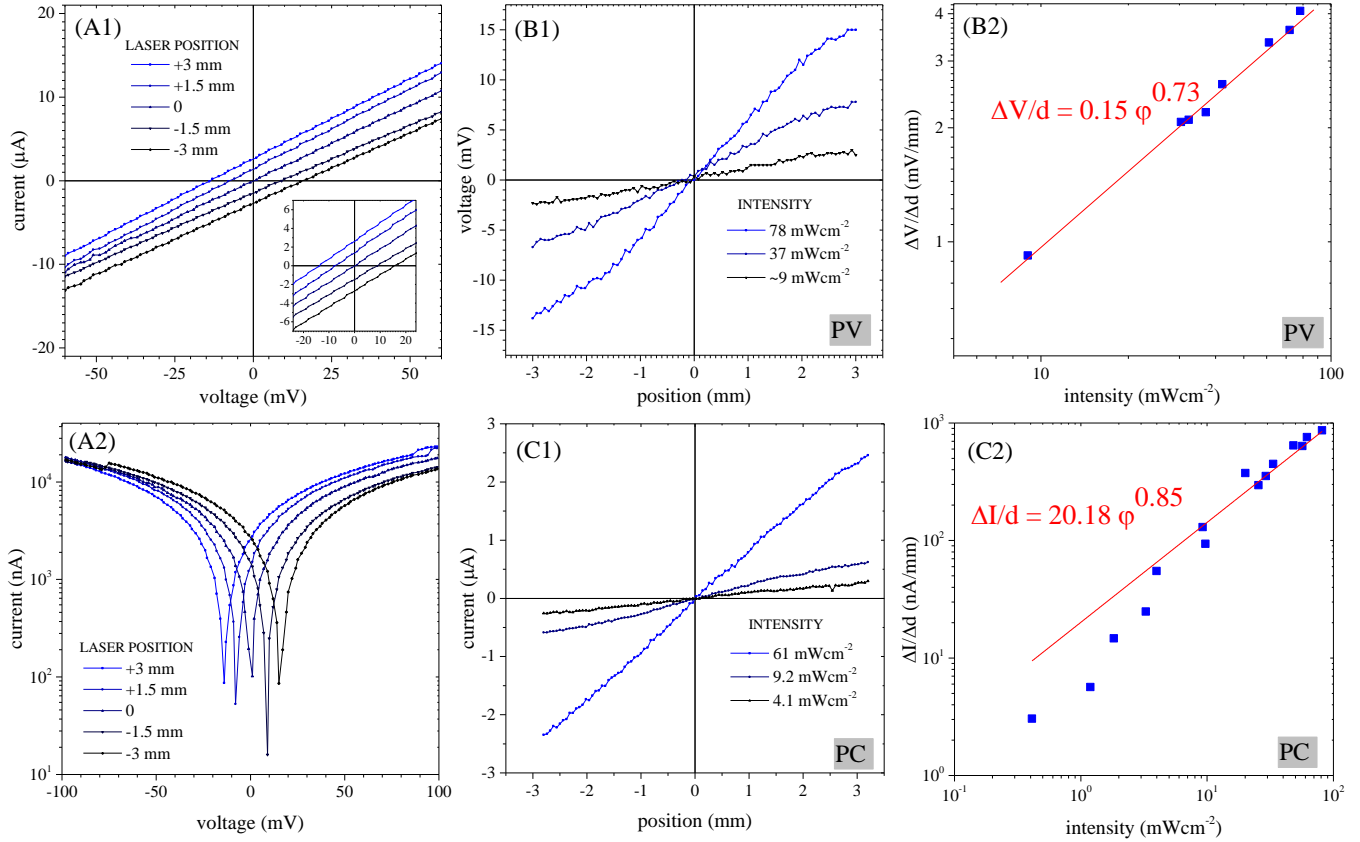

**Figure S5.** PSD response characteristics upon blue laser illumination ( $\lambda = 405 \text{ nm}$ ). (A1 and A2) Current-voltage characteristics under localized blue illumination (spot size  $\approx 300 \mu\text{m}$ ). (B1 and C1) Photovoltage-position and photocurrent-position in photovoltage and photocurrent operational modes. (B2 and C2) The dependence of PSD sensitivity on the incident light intensity in PV and PC modes.

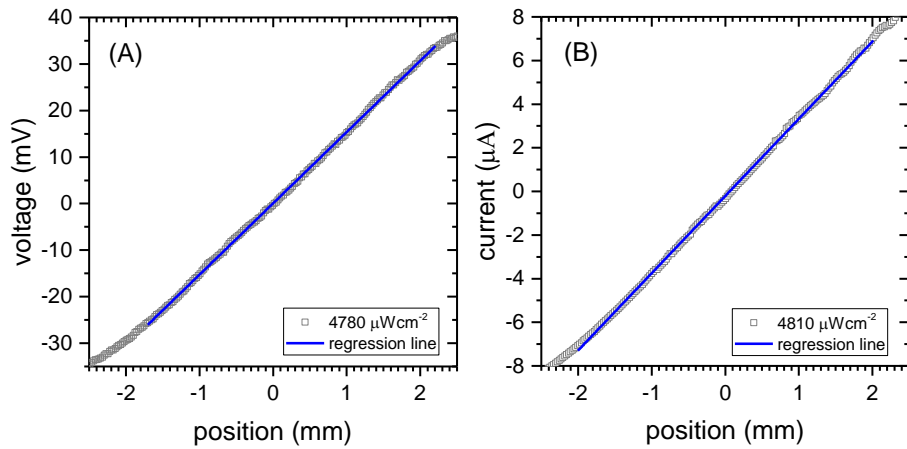

**Figure S6.** Linear response of the PSD and the corresponding regression line in (A) PV and (B) PD operational modes. The position of IR spot is changed with  $25 \mu\text{m}$  increments.

**Table S1.** The details of SAED pattern analysis shown in Figure 1(C4) of the main manuscript

CrysTBox diffractGUI - analysis report

**File:** 19.jpeg  
**Zone axis:** 2 3 2

**Material:** MoS<sub>2</sub>  
**Estimate Rating:** Very good

**Source file:** Crystallography Open Database (COD)

Information card for entry 9007660 (<http://www.crystallography.net/cod/9007660.html>)

Mineral name: [Molybdenite](#) Formula: [MoS<sub>2</sub>](#) Calculated formula: [Mo<sub>2</sub>S<sub>4</sub>](#) Revision: 188410 Date: 2016-11-13

<http://www.crystallography.net/cod/9007660.cif@188410>

**Lattice vectors:**

Lattice vectors are quantified. Vector lengths in direct and reciprocal space, their ratios and angular distances are enumerated.

|          | d-spacing |          | d-spacing<br>(Cal.coef.=11.85) |          | d-spacing ratios [-] |          |         |        |         |         |
|----------|-----------|----------|--------------------------------|----------|----------------------|----------|---------|--------|---------|---------|
|          | [nm]      | [1/nm]   | [nm]                           | [1/nm]   | A                    | B        | C       | D      |         |         |
| <b>A</b> | 0.0082013 | 121.9319 | <b>A</b>                       | 0.097185 | 10.2896              | <b>A</b> | 1       | 1.4548 | 0.93545 | 1.2782  |
| <b>B</b> | 0.0056374 | 177.3869 | <b>B</b>                       | 0.066803 | 14.9694              | <b>B</b> | 0.68738 | 1      | 0.64301 | 0.87858 |
| <b>C</b> | 0.0087672 | 114.0612 | <b>C</b>                       | 0.10389  | 9.6254               | <b>C</b> | 1.069   | 1.5552 | 1       | 1.3664  |
| <b>D</b> | 0.0064165 | 155.8478 | <b>D</b>                       | 0.076036 | 13.1517              | <b>D</b> | 0.78238 | 1.1382 | 0.73188 | 1       |

**Zone axis estimate:**

Individual lattice vectors are crystallographically identified and the zone axis is calculated.

| vector identification | Zone axis:              | 2 3 2     |
|-----------------------|-------------------------|-----------|
|                       | Estimation rating:      | Very good |
| <b>A</b> -1 -2 4      | Consistency check:      | OK        |
| <b>B</b> -4 0 4       | Lattice check:          | OK        |
| <b>C</b> -3 2 0       | Total angular distance: | 1.40      |
| <b>D</b> -2 4 -4      | D-spacing STDEV:        | 0.0005    |

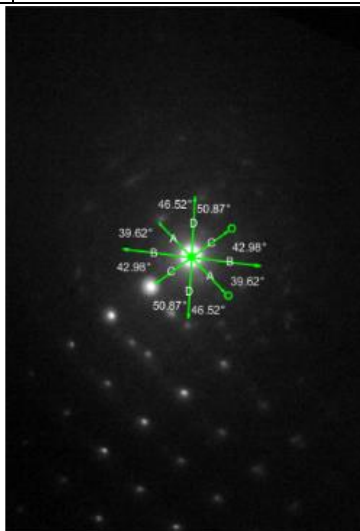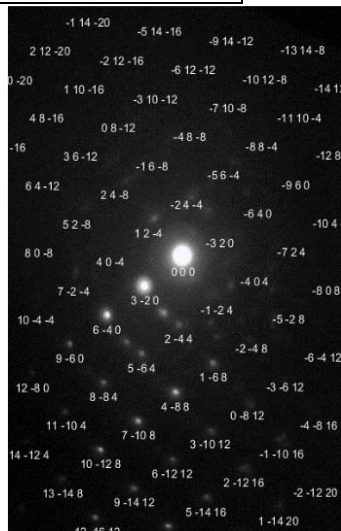

This report is generated using software CrysTBox diffractGUI 2.21 by Miloslav Klinger.

**Ref:** M. Klinger. More features, more tools, more CrysTBox. Journal of Applied Crystallography, 50, 2017.

doi:10.1107/S1600576717006793

**Table S2.** The details of SAED pattern analysis shown in Figure 1(C5) of the main manuscript

CrysTBox diffractGUI - analysis report

**File:** 21.jpeg **Zone axis:** -3 -3 1  
**Material:** Mo O3 **Estimate Rating:** Excellent

**Source file:**

American Mineralogist Crystal Structure Database (AMCSD)

Database code amcsd: 0018894 Mineral name: Molybdate Formula: Mo O3 Date: 2009

**Ref:** Sitepu H, Powder Diffraction 24 (2009) 315-326, Texture and structural refinement using neutron diffraction data from molybdate (MoO<sub>3</sub>) and calcite (CaCO<sub>3</sub>) powders and a Ni-rich Ni<sub>50.7</sub>Ti<sub>49.30</sub> alloy  
<http://rruff.geo.arizona.edu/AMS/minerals/Molybdate>

<http://rruff.geo.arizona.edu/AMS/download.php?id=19447.cif&down=text>

**Lattice vectors:**

Lattice vectors are quantified. Vector lengths in direct and reciprocal space, their ratios and angular distances are enumerated.

| d-spacing |           | d-spacing (Cal.coef.=11.85) |   | d-spacing ratios [-] |         |   |         |        |         |         |
|-----------|-----------|-----------------------------|---|----------------------|---------|---|---------|--------|---------|---------|
|           | [nm]      | [1/nm]                      |   | [nm]                 | [1/nm]  | A | B       | C      | D       |         |
| A         | 0.0063552 | 157.3515                    | A | 0.12393              | 8.0693  | A | 1       | 1.4157 | 0.97689 | 1.38    |
| B         | 0.0044892 | 222.7576                    | B | 0.087539             | 11.4235 | B | 0.70638 | 1      | 0.69006 | 0.97483 |
| C         | 0.0065055 | 153.7152                    | C | 0.12686              | 7.8828  | C | 1.0237  | 1.4492 | 1       | 1.4127  |
| D         | 0.0046051 | 217.1515                    | D | 0.089799             | 11.136  | D | 0.72462 | 1.0258 | 0.70787 | 1       |

**Zone axis estimate:**

Individual lattice vectors are crystallographically identified and the zone axis is calculated.

| vector identification |         | Zone axis:              | -3 -3 1   |
|-----------------------|---------|-------------------------|-----------|
|                       |         | Estimation rating:      | Excellent |
| A                     | 0 1 3   | Consistency check:      | OK        |
| B                     | -3 4 3  | Lattice check:          | OK        |
| C                     | -3 3 0  | Total angular distance: | 0.74      |
| D                     | -3 2 -3 | D-spacing STDEV:        | 0.0005    |

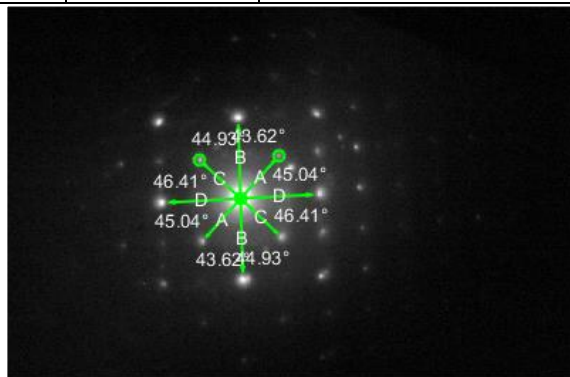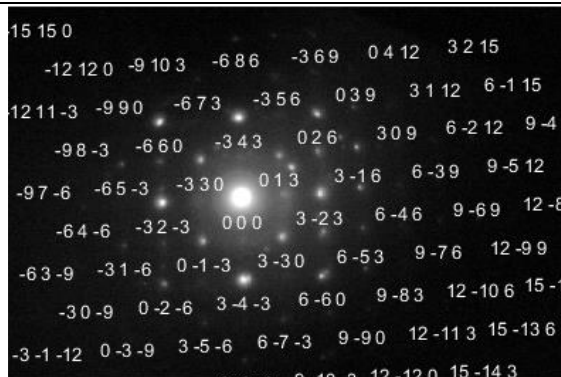

This report is generated using software CrysTBox diffractGUI 2.21 by Miloslav Klinger.

**Ref:** M.Klinger. More features, more tools, more CrysTBox. Journal of Applied Crystallography, 50, 2017.  
[doi:10.1107/S1600576717006793](https://doi.org/10.1107/S1600576717006793)
